# Supplementary material
Source: PubMed Central journal article supplement (PMC7426010)
Supplement: 405_2020_6284_MOESM1_ESM.pdf [file 405_2020_6284_MOESM1_ESM.pdf]

**Patient Data Form**

**Name, Surname:**

**Contact Info:**

**Age:**

**Co-morbidities:**

**Medications:**

**Chronic Otorhinolaryngologic Diseases or Previous Surgeries:**

**Medications for Otorhinolaryngologic Diseases:**

**Hospital Admission Date:**

**Clinical Group:**

**PCR Test Results:**

| Date | Result |
|------|--------|
|      |        |
|      |        |
|      |        |

**Imaging Findings:**

| Date | Imaging Type (CT vs CXR) | Findings |
|------|--------------------------|----------|
|      |                          |          |
|      |                          |          |
|      |                          |          |

**Treatment:**

| Medication          | Treatment Initiation Date | Ending Date | Notes |
|---------------------|---------------------------|-------------|-------|
| Hydroxychloroquine  |                           |             |       |
| Oseltamivir         |                           |             |       |
| Lopinavir-Ritonavir |                           |             |       |
| Favipiravir         |                           |             |       |
| Azithromycine       |                           |             |       |
| Other               |                           |             |       |

|                                      | <b>Severity Score (0-10)</b> | <b>Start Date</b> | <b>End Date</b> | <b>Notes</b> |
|--------------------------------------|------------------------------|-------------------|-----------------|--------------|
| <b>General Symptoms</b>              |                              |                   |                 |              |
| Fever                                |                              |                   |                 |              |
| Cough                                |                              |                   |                 |              |
| Fatigue                              |                              |                   |                 |              |
| Dyspnea                              |                              |                   |                 |              |
| Myalgia/Arthralgia                   |                              |                   |                 |              |
| Headache                             |                              |                   |                 |              |
| <b>Otorhinolaryngologic Symptoms</b> |                              |                   |                 |              |
| Frontal Type Headache                |                              |                   |                 |              |
| Nasal Congestion                     |                              |                   |                 |              |
| Rhinorrhea                           |                              |                   |                 |              |
| Sore Throat                          |                              |                   |                 |              |
| Dry Throat                           |                              |                   |                 |              |
| Loss of Smell                        |                              |                   |                 |              |
| Loss of Taste                        |                              |                   |                 |              |
| Earache                              |                              |                   |                 |              |
| Dizziness                            |                              |                   |                 |              |
| Hearing Loss                         |                              |                   |                 |              |
| Facial Paralysis                     |                              |                   |                 |              |
